# Supplementary material for: ERAP2 as a potential biomarker for predicting gemcitabine response in patients with pancreatic cancer
Source: publisher site journal article supplement (doi:10.18632/aging.204324), 2022-10-08
Supplement: Supplementary file [file aging-v14i19-204324-supplementary-material-SD1.pdf]

## SUPPLEMENTARY FIGURES

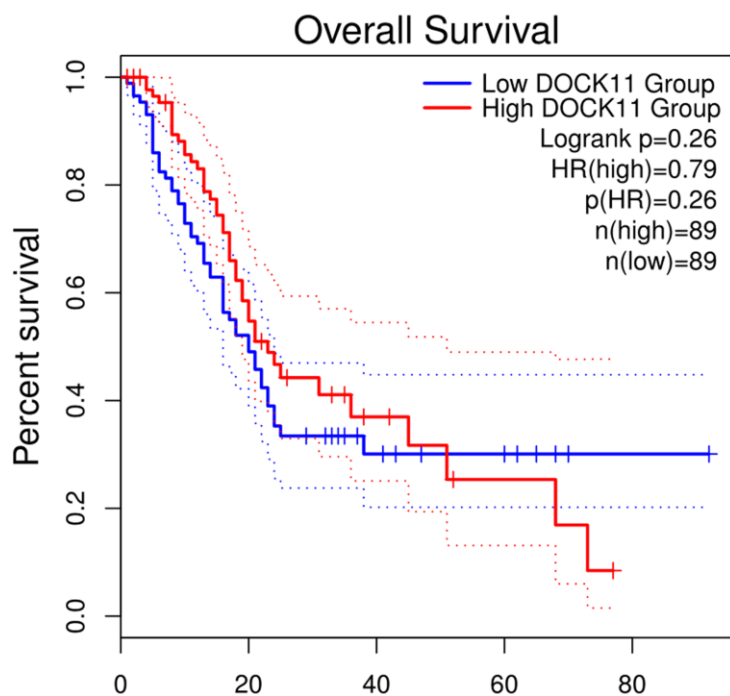

**Supplementary Figure 1. Prognosis of DOCK11 in pancreatic cancer.** Kaplan-Meier survival curve of DOCK11 in pancreatic cancer data set from GEPIA database.

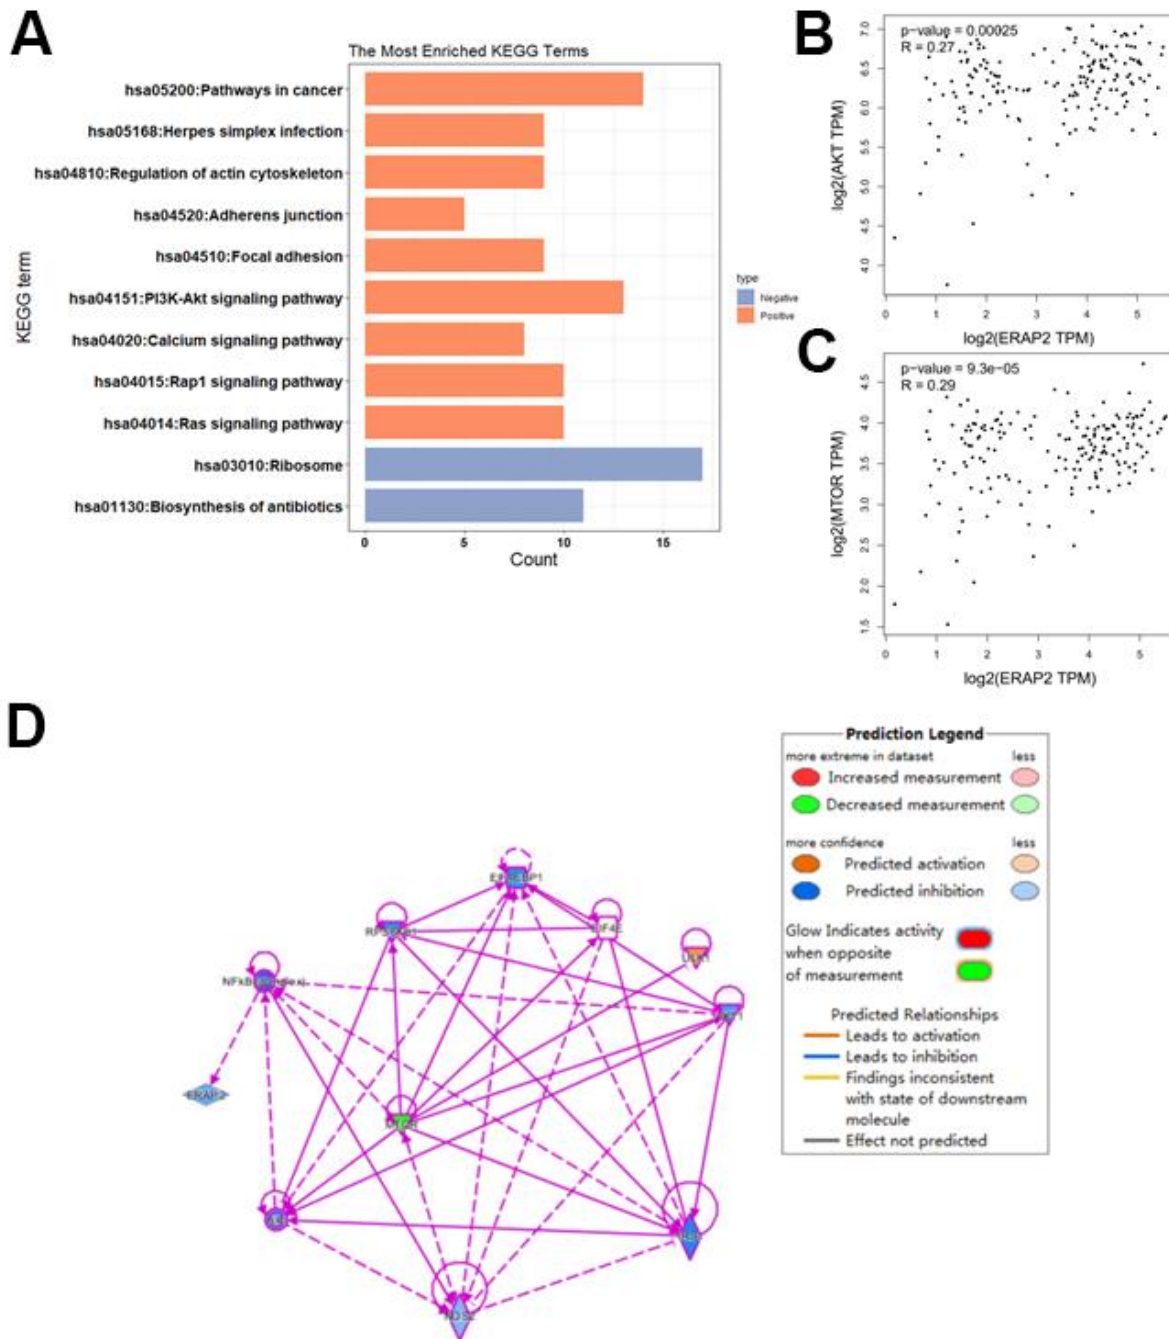

**Supplementary Figure 2. ERAP2 involved in the classic AKT/mTOR pathway.** (A) KEGG pathway analysis to validate the effects of ERAP2. (B) The correlation between ERAP2 and AKT was analyzed by GEPIA analysis tool. (C) The correlation between ERAP2 and mTOR was analyzed by GEPIA analysis tool. (D) The regulatory network of ERAP2 is constructed using IPA software.
